# Supplementary material for: Elaboration and Characterization of a Biochar from Wastewater Sludge and Olive Mill Wastewater
Source: MDPI journal article supplement (doi:10.3390/su15032409), 2023-01-29
Supplement: s1 [file s1]

Archive with 1 entries (1 files):
- sustainability-2174194-supplementary.pdf
