# Supplementary figures and images for: Elaboration and Characterization of a Biochar from Wastewater Sludge and Olive Mill Wastewater
Source: MDPI journal article supplement (doi:10.3390/su15032409), 2023-01-29

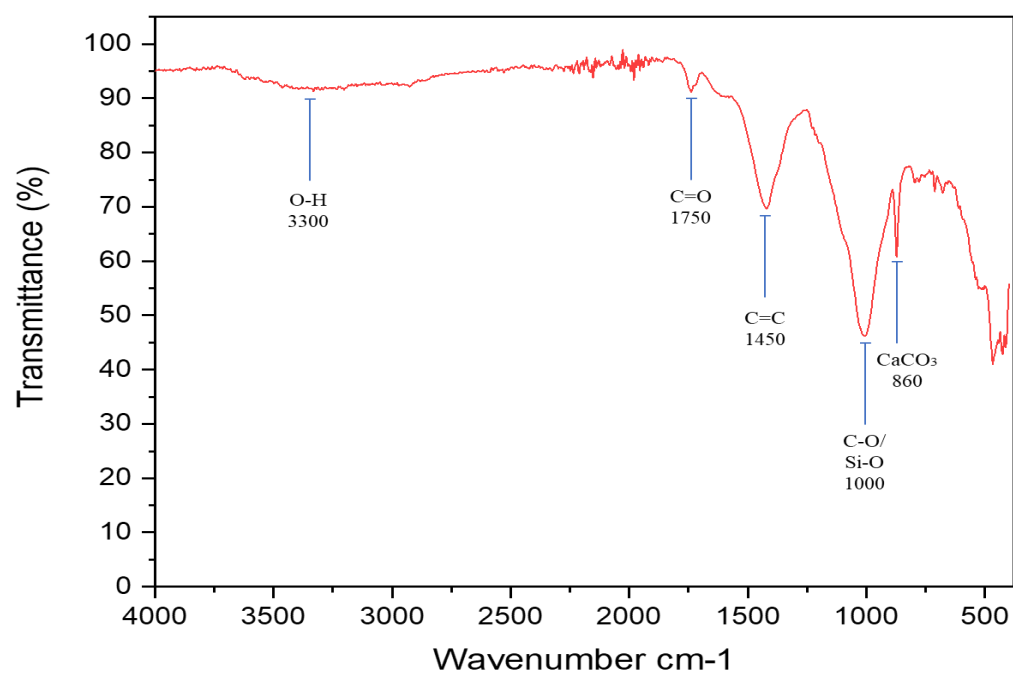

Figure S1. Infrared spectrum of Biochar.

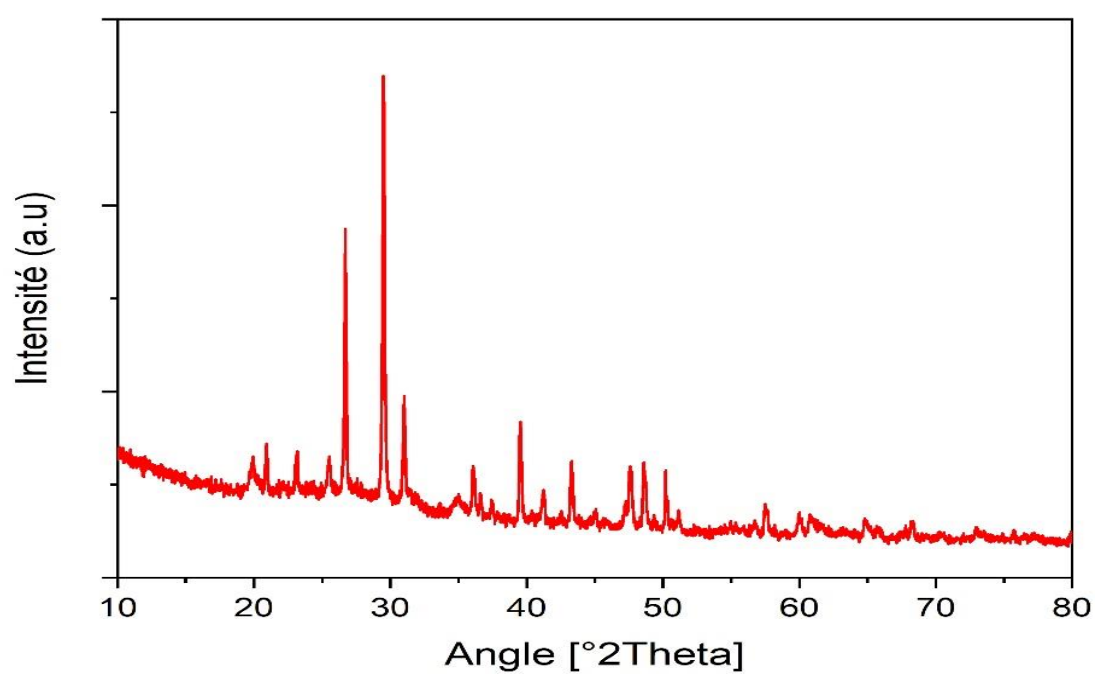

Figure S2. X-ray spectrum of Biochar (BY1B).

Supplement: s1 [file s1 › sustainability-2174194-supplementary.pdf]
